# Supplementary material for: Programmes to prepare siblings for future roles to support their brother or sister with a neurodisability: protocol of a scoping review
Source: HighWire-hosted journal article supplement (doi:10.1136/bmjopen-2021-053184), 2021-07-01
Supplement: bmjopen-2021-053184supp002_data_supplement.pdf [file bmjopen-2021-053184supp002_data_supplement.pdf]

**Supplementary File 2: Data extraction instrument**

| <b>Study Information</b>                  |                                                                                                                      |                        |                          |
|-------------------------------------------|----------------------------------------------------------------------------------------------------------------------|------------------------|--------------------------|
| <b>Date form completed</b>                | Identify the date that the form was completed (dd/mm/yyyy).                                                          |                        |                          |
| <b>Name of person extracting data</b>     | Identify the reviewer who extracted the data for this form.                                                          |                        |                          |
| <b>Study title</b>                        | Identify the full title and subtitle.                                                                                |                        |                          |
| <b>Authors</b>                            | Identify all authors as follows: "last name, initial of first name."                                                 |                        |                          |
| <b>Author affiliations</b>                | List affiliations of all authors (e.g., program, department, institution).                                           |                        |                          |
| <b>Country</b>                            | Identify the country where the study was conducted.                                                                  |                        |                          |
| <b>Study funding source</b>               | Describe the funding source for the study and role of funders.                                                       |                        |                          |
| <b>Possible conflicts of interest</b>     | Identify possible conflicts of interest declared by authors.                                                         |                        |                          |
| <b>Population and Setting</b>             |                                                                                                                      |                        |                          |
| <b>Participant inclusion criteria</b>     | Describe the participant inclusion criteria.                                                                         |                        |                          |
| <b>Participant exclusion criteria</b>     | Describe the participant exclusion criteria.                                                                         |                        |                          |
| <b>Participant characteristics</b>        | <b>Total number</b>                                                                                                  | <b>Number of males</b> | <b>Number of females</b> |
|                                           | <b>Age (years)</b>                                                                                                   |                        |                          |
|                                           | <b>Education level</b>                                                                                               |                        |                          |
|                                           | <b>Race/ethnicity</b>                                                                                                |                        |                          |
|                                           | <b>Diagnosis of participant's siblings</b>                                                                           |                        |                          |
| <b>Methods of participant recruitment</b> | Identify the different methods of participant recruitment (e.g., social media, word of mouth, participant referral). |                        |                          |
| <b>Setting context</b>                    | Describe the environment that the program was implemented (e.g., community, college, university, after school).      |                        |                          |
| <b>Methods</b>                            |                                                                                                                      |                        |                          |
| <b>Study aim</b>                          | Identify the study aims.                                                                                             |                        |                          |

|                                |                                                                                                                                                                         |
|--------------------------------|-------------------------------------------------------------------------------------------------------------------------------------------------------------------------|
| <b>Type of methodology</b>     | Describe the methodology that was used.                                                                                                                                 |
| <b>Data collection methods</b> | Identify the methods used for data collection (e.g., self-reports, assessment tools, surveys, interviews).                                                              |
| <b>Analysis methods</b>        | Identify the methods of analysis (e.g., statistical analyses, qualitative analytic techniques).                                                                         |
| <b>Program Characteristics</b> |                                                                                                                                                                         |
| <b>Name</b>                    | Identify the full name and/or abbreviation.                                                                                                                             |
| <b>Objective(s)</b>            | State the objectives of the program.                                                                                                                                    |
| <b>Duration and frequency</b>  | Identify the number and length of sessions, as well as the frequency of sessions.                                                                                       |
| <b>Mode of delivery</b>        | Identify the mode of delivery (e.g., online, in-person).                                                                                                                |
| <b>Start date</b>              | Provide the specific start date of the program (month, year).                                                                                                           |
| <b>End date</b>                | Provide the specific end date of the program (month, year).                                                                                                             |
| <b>Activities</b>              | Identify the activities that were provided in the programs (e.g., weekly meetings, educational workshops, training activities).                                         |
| <b>Developers</b>              | Describe the people who developed the program (e.g., number of developers, background, qualifications, skill level).                                                    |
| <b>Facilitators</b>            | Describe the people who facilitated the program (e.g., number of facilitators, background, qualifications, education level).                                            |
| <b>Participants' needs</b>     | Describe the needs of participants in their roles as a sibling while participating in the program.                                                                      |
| <b>Participants' goals</b>     | Describe the goals of participants in the program and the progress towards achieving these goals.                                                                       |
| <b>Outcomes</b>                | Report on the outcomes of participants after participating in the program (e.g., satisfaction with the program, knowledge acquisition, skill development, empowerment). |
| <b>Evaluation</b>              | Describe the methods, instruments, and frequency of evaluation assessments.                                                                                             |
| <b>Sustainability</b>          | Describe how the program will be sustained.                                                                                                                             |

|                           |                                                                 |
|---------------------------|-----------------------------------------------------------------|
| Study reference           | Provide the full reference for the study.                       |
| Other studies of interest | Identify other studies of interest based on the reference list. |
